# Supplementary material for: A Systematic Review and Meta-Analysis of Mean Platelet Volume and Platelet Distribution Width in Patients with Obstructive Sleep Apnoea Syndrome
Source: MDPI journal article supplement (doi:10.3390/biomedicines12020270), 2024-01-24
Supplement: s1 [file s1]

## **Full search strategy**

### **PubMed**

("OSAS"[All Fields] OR "OSA"[All Fields] OR "obstructive sleep apnea syndrome"[All Fields]) AND ("complete blood count"[All Fields] OR "CBC"[All Fields] OR "full blood count"[All Fields] OR "FBC"[All Fields] OR "mean platelet volume"[All Fields] OR "MPV"[All Fields] OR "platelet distribution width"[All Fields] OR "PDW"[All Fields])

### **Web of Science**

("OSAS" OR "OSA" OR "obstructive sleep apnea syndrome") AND ("complete blood count" OR "CBC" OR "full blood count" OR "FBC" OR "mean platelet volume" OR "MPV" OR "platelet distribution width" OR "PDW") (All Fields)

### **Scopus**

TITLE-ABS-KEY (( "OSAS" OR "OSA" OR "obstructive sleep apnea syndrome" ) AND ( "complete blood count" OR "CBC" OR "full blood count" OR "FBC" OR "mean platelet volume" OR "MPV" OR "platelet distribution width" OR "PDW" ))

**Suppl. Table S1.** The Joanna Briggs Institute critical appraisal checklist for the included studies.

[illegible]

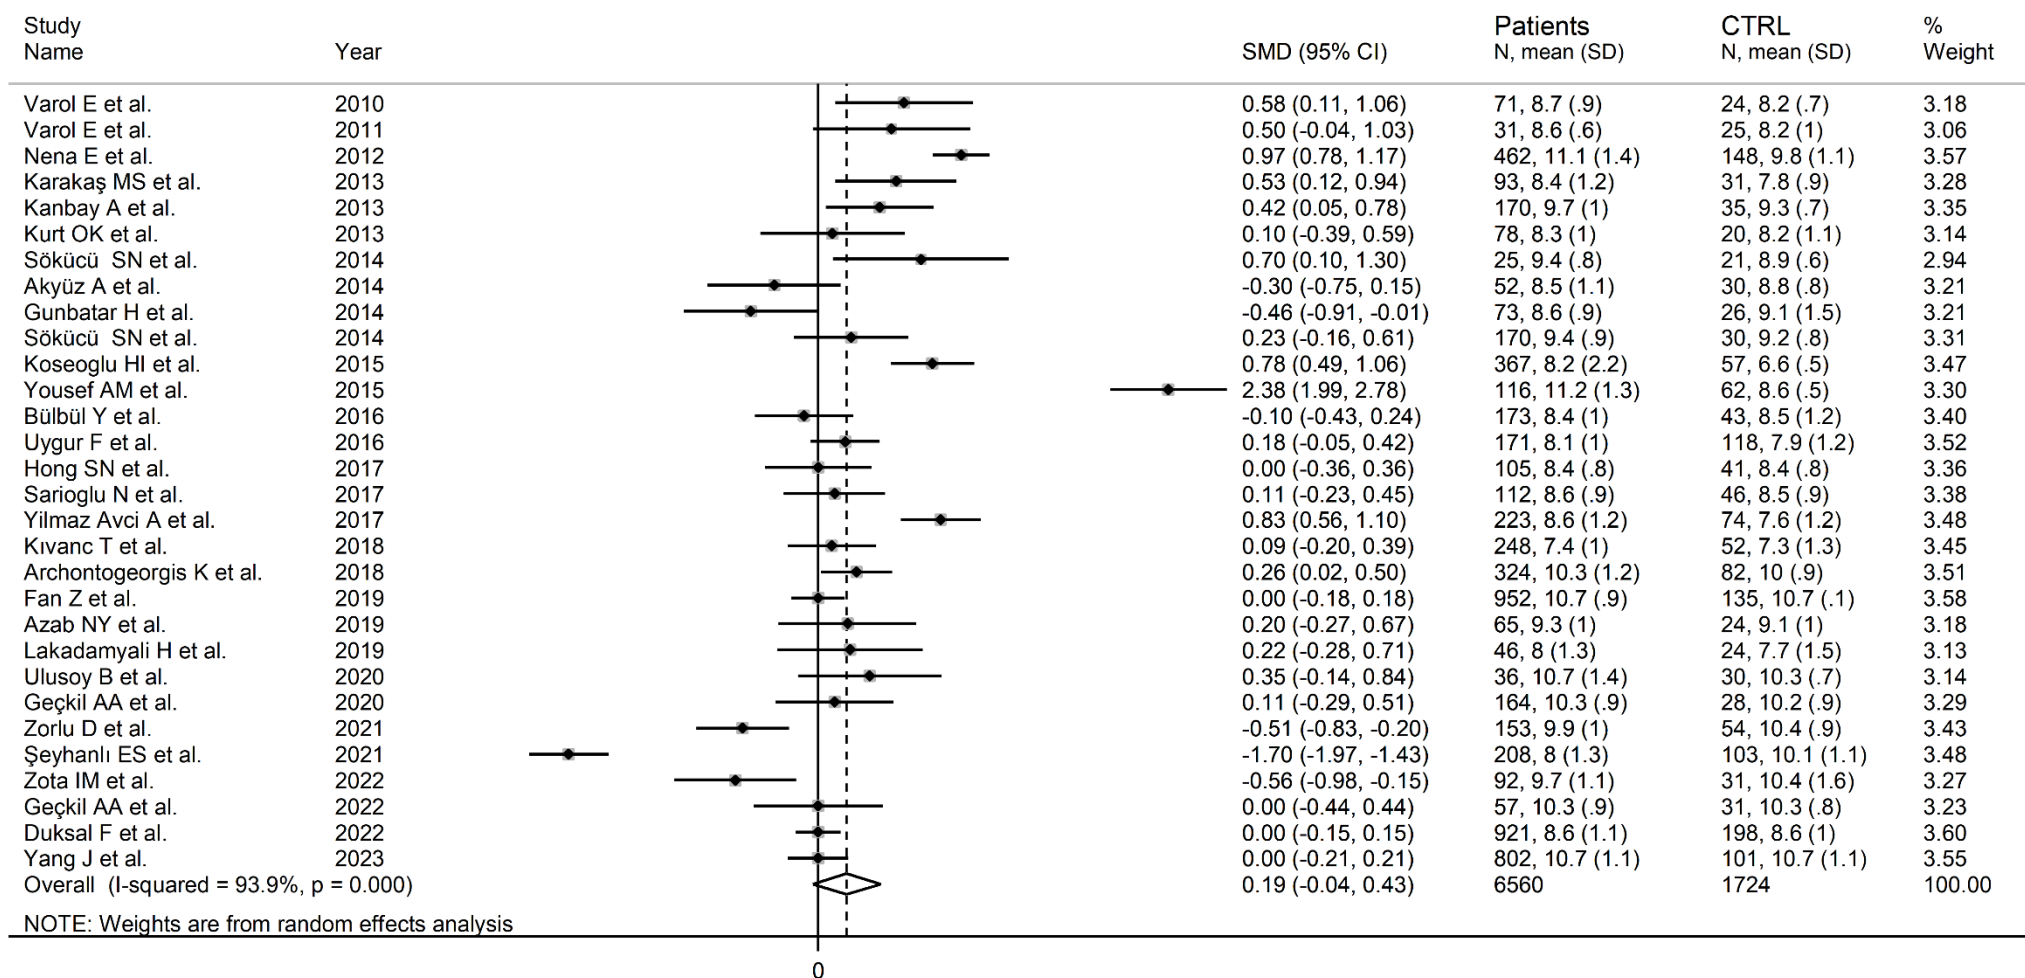

**Suppl. Figure S1.** Forest plot of studies examining MPV values of OSAS patients and controls.

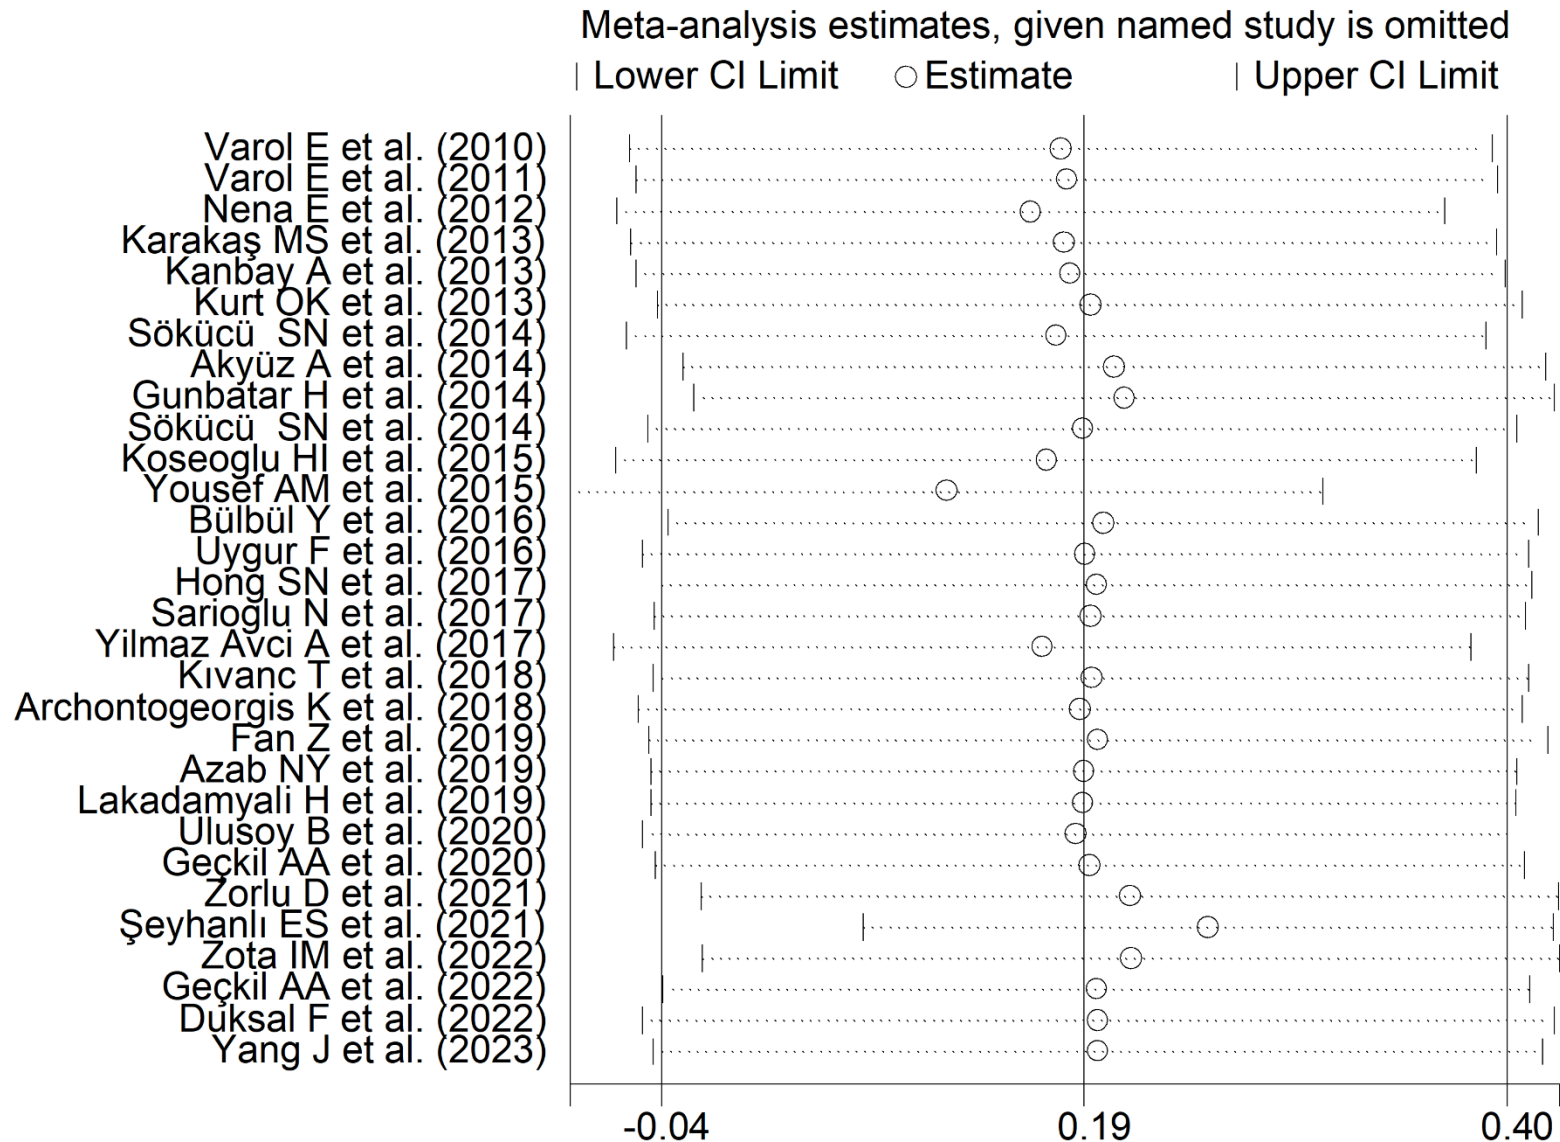

**Suppl. Figure S2.** Sensitivity analysis of the association between MPV values and OSAS. For each study, the displayed effect size (hollow circles) corresponds to an overall effect size computed from a meta-analysis excluding that study.

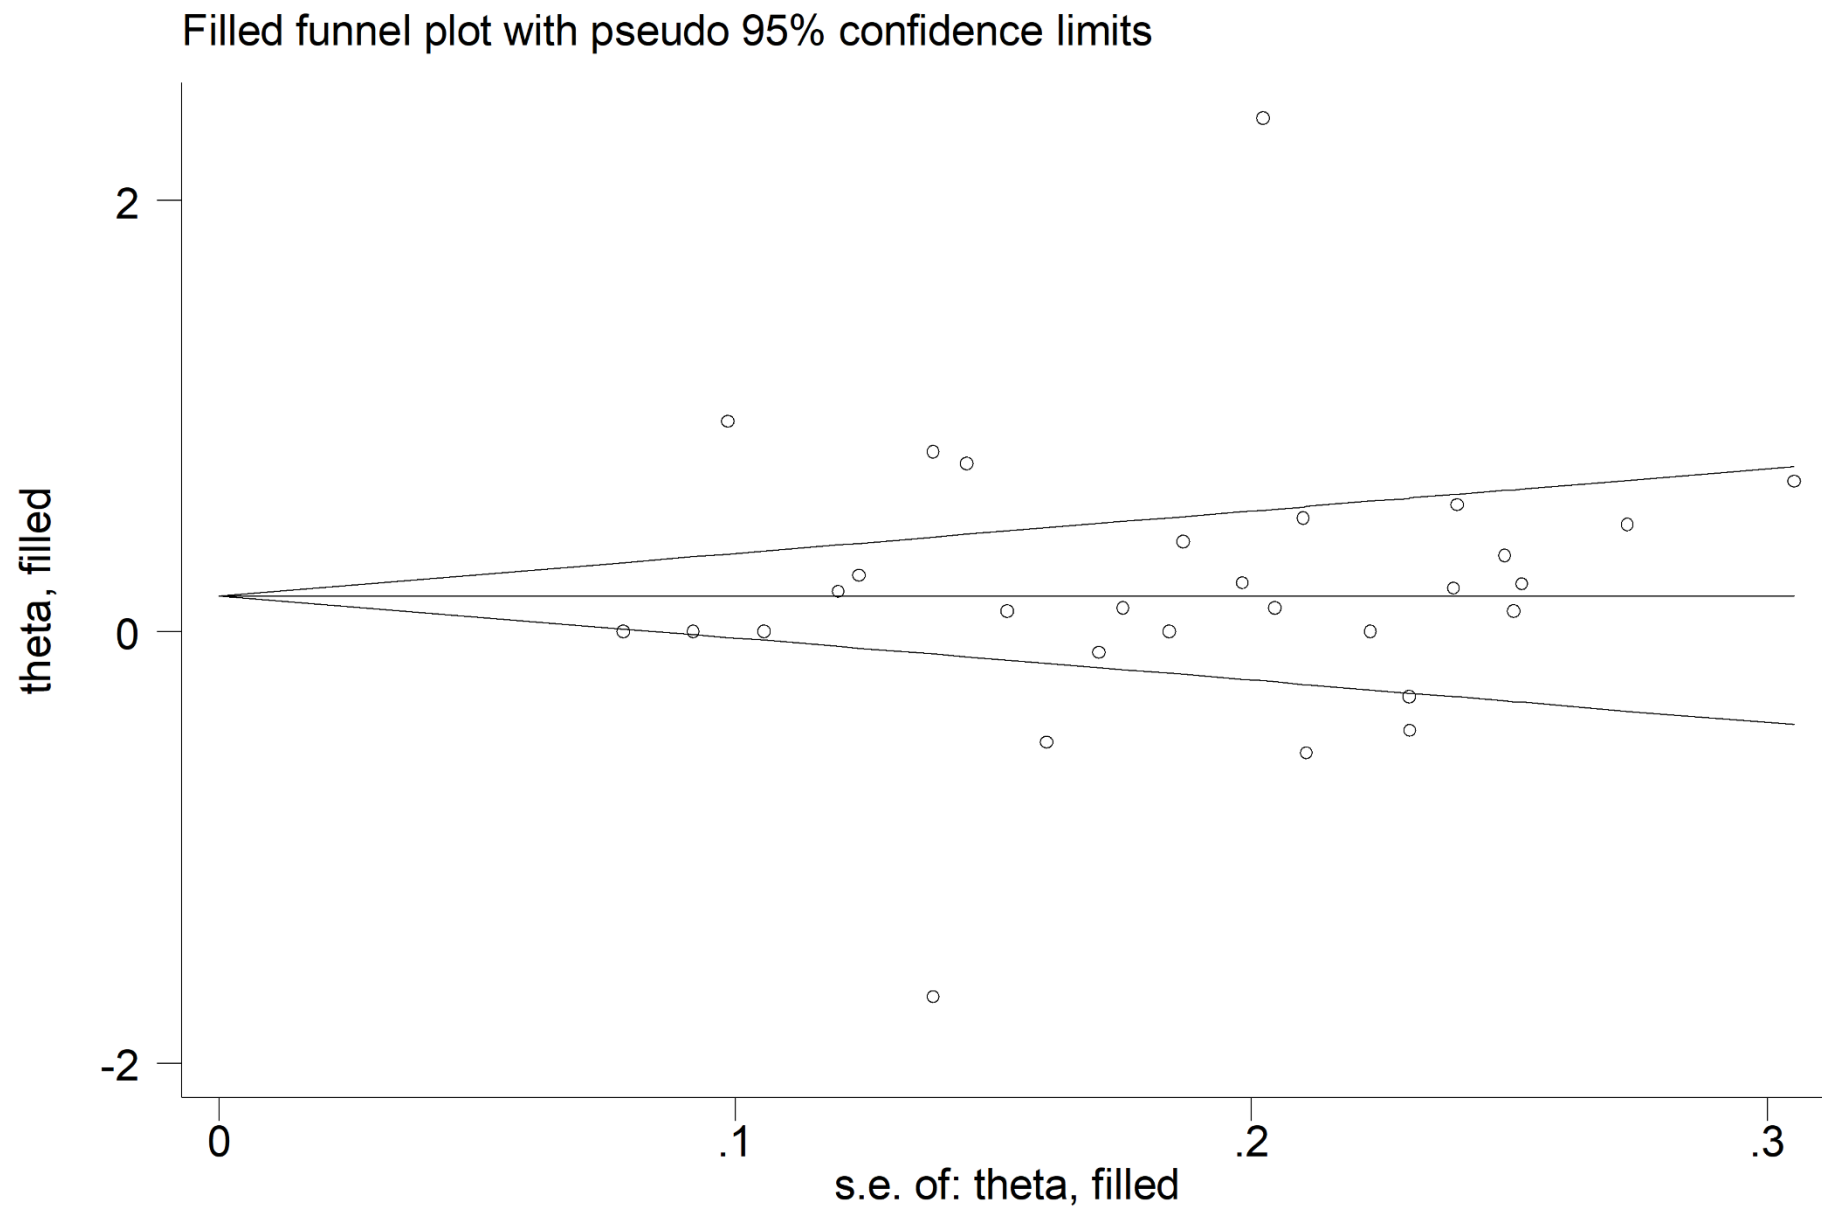

**Suppl. Figure S3.** Funnel plot of studies investigating association between MPV values and OSAS after trimming and filling. Dummy studies and genuine studies are represented by enclosed circles and free circles, respectively.

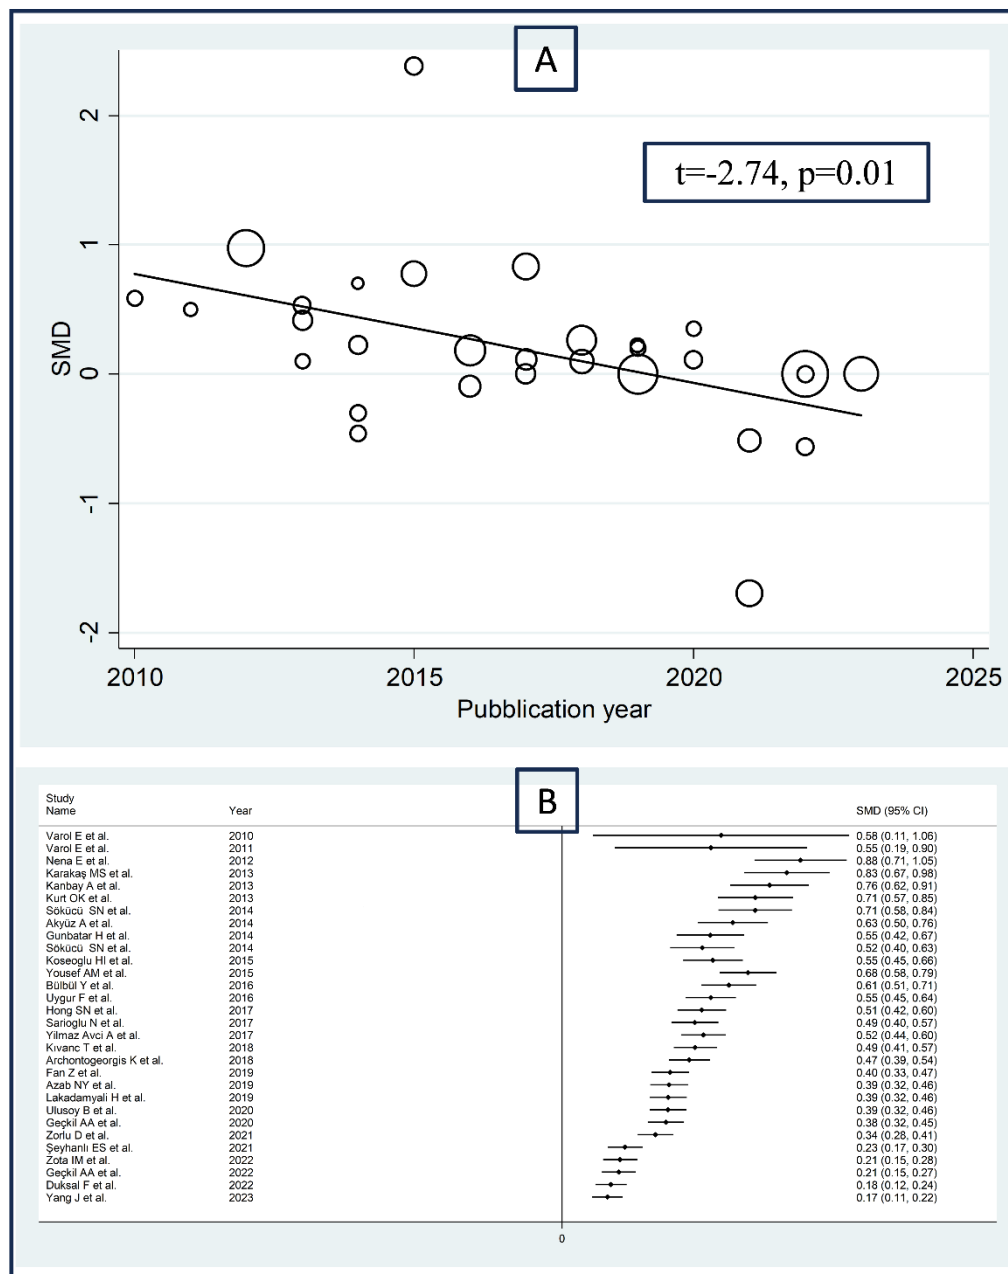

**Suppl. Figure S4.** Bubble plot reporting univariate meta-regression analysis between effect size and publication year (A) and cumulative meta-analysis of MPV values based on publication year (B).

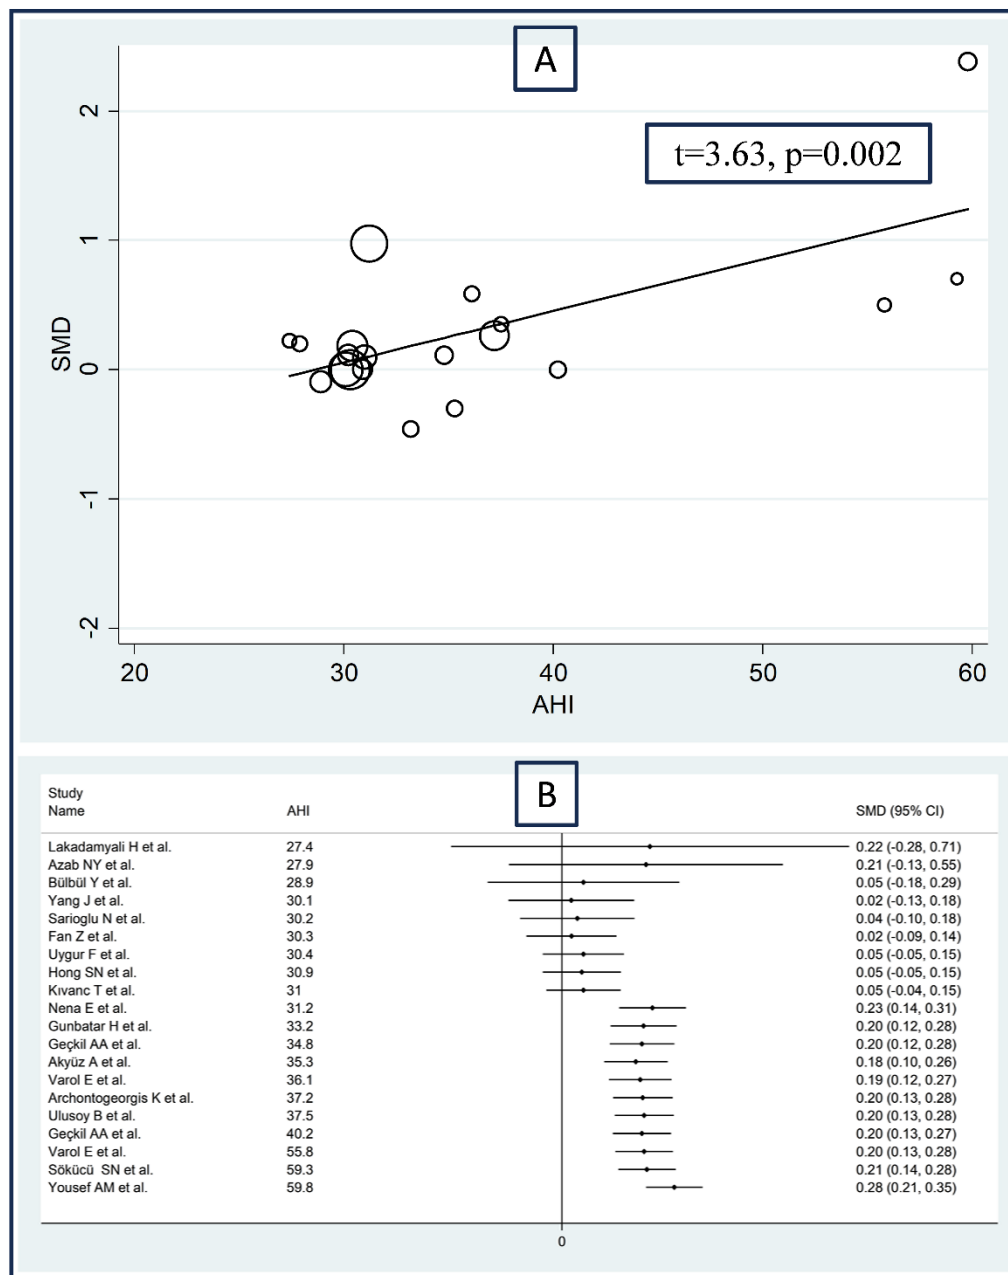

**Suppl. Figure S5.** Bubble plot reporting univariate meta-regression analysis between effect size and AHI (A) and cumulative meta-analysis of MPV values based on AHI (B).

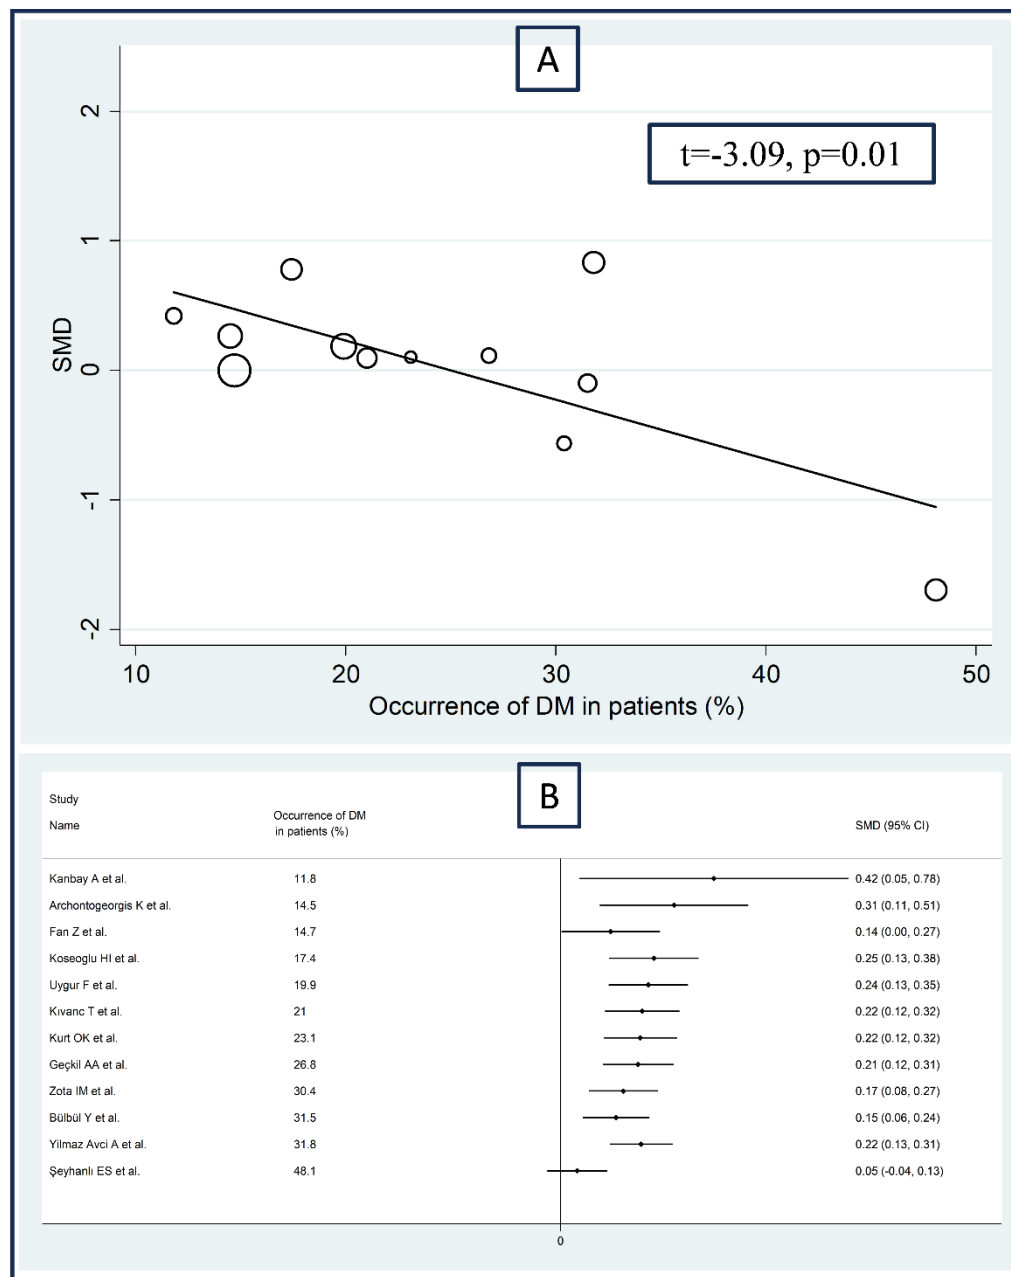

**Suppl. Figure S6.** Bubble plot reporting univariate meta-regression analysis between effect size and occurrence of DM in patients (A) and cumulative meta-analysis of MPV values based on occurrence of DM in patients (B).



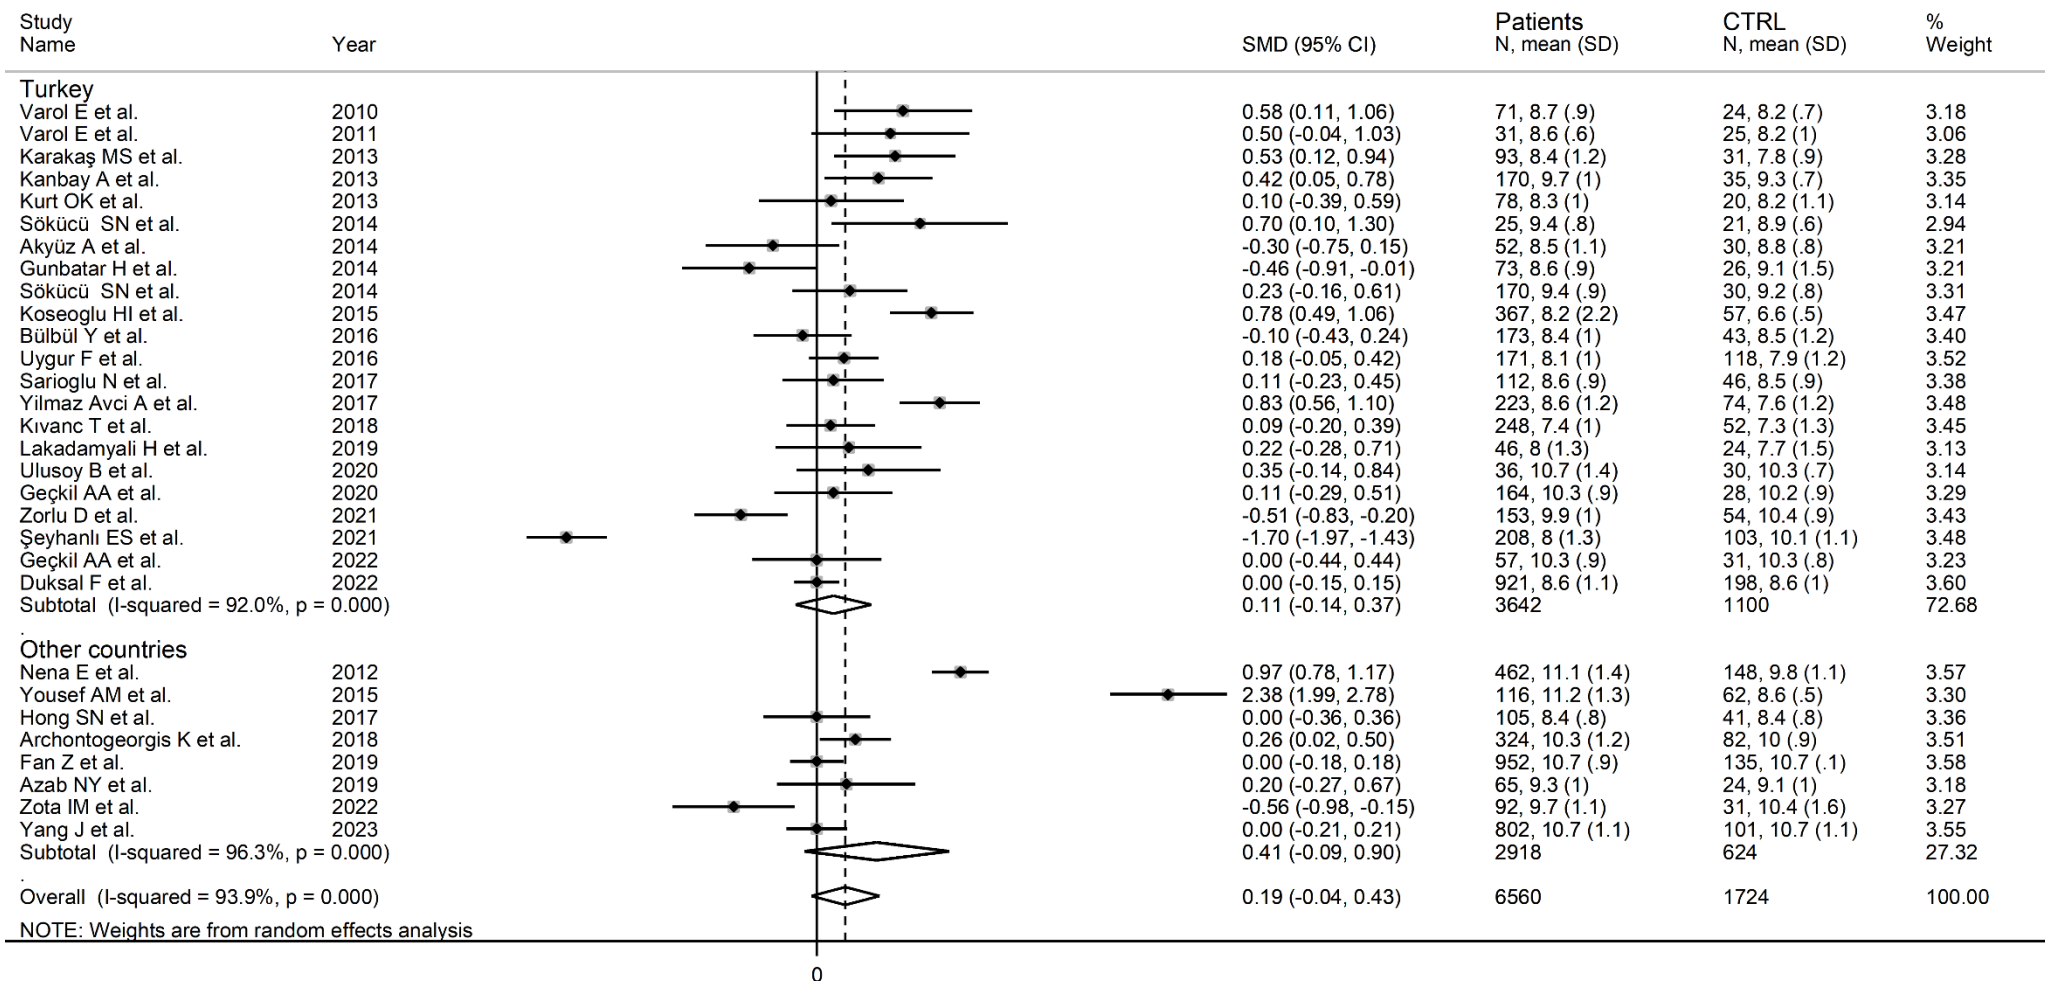

**Suppl. Figure S7.** Forest plot of studies examining MPV values of OSAS patients and controls according to country.

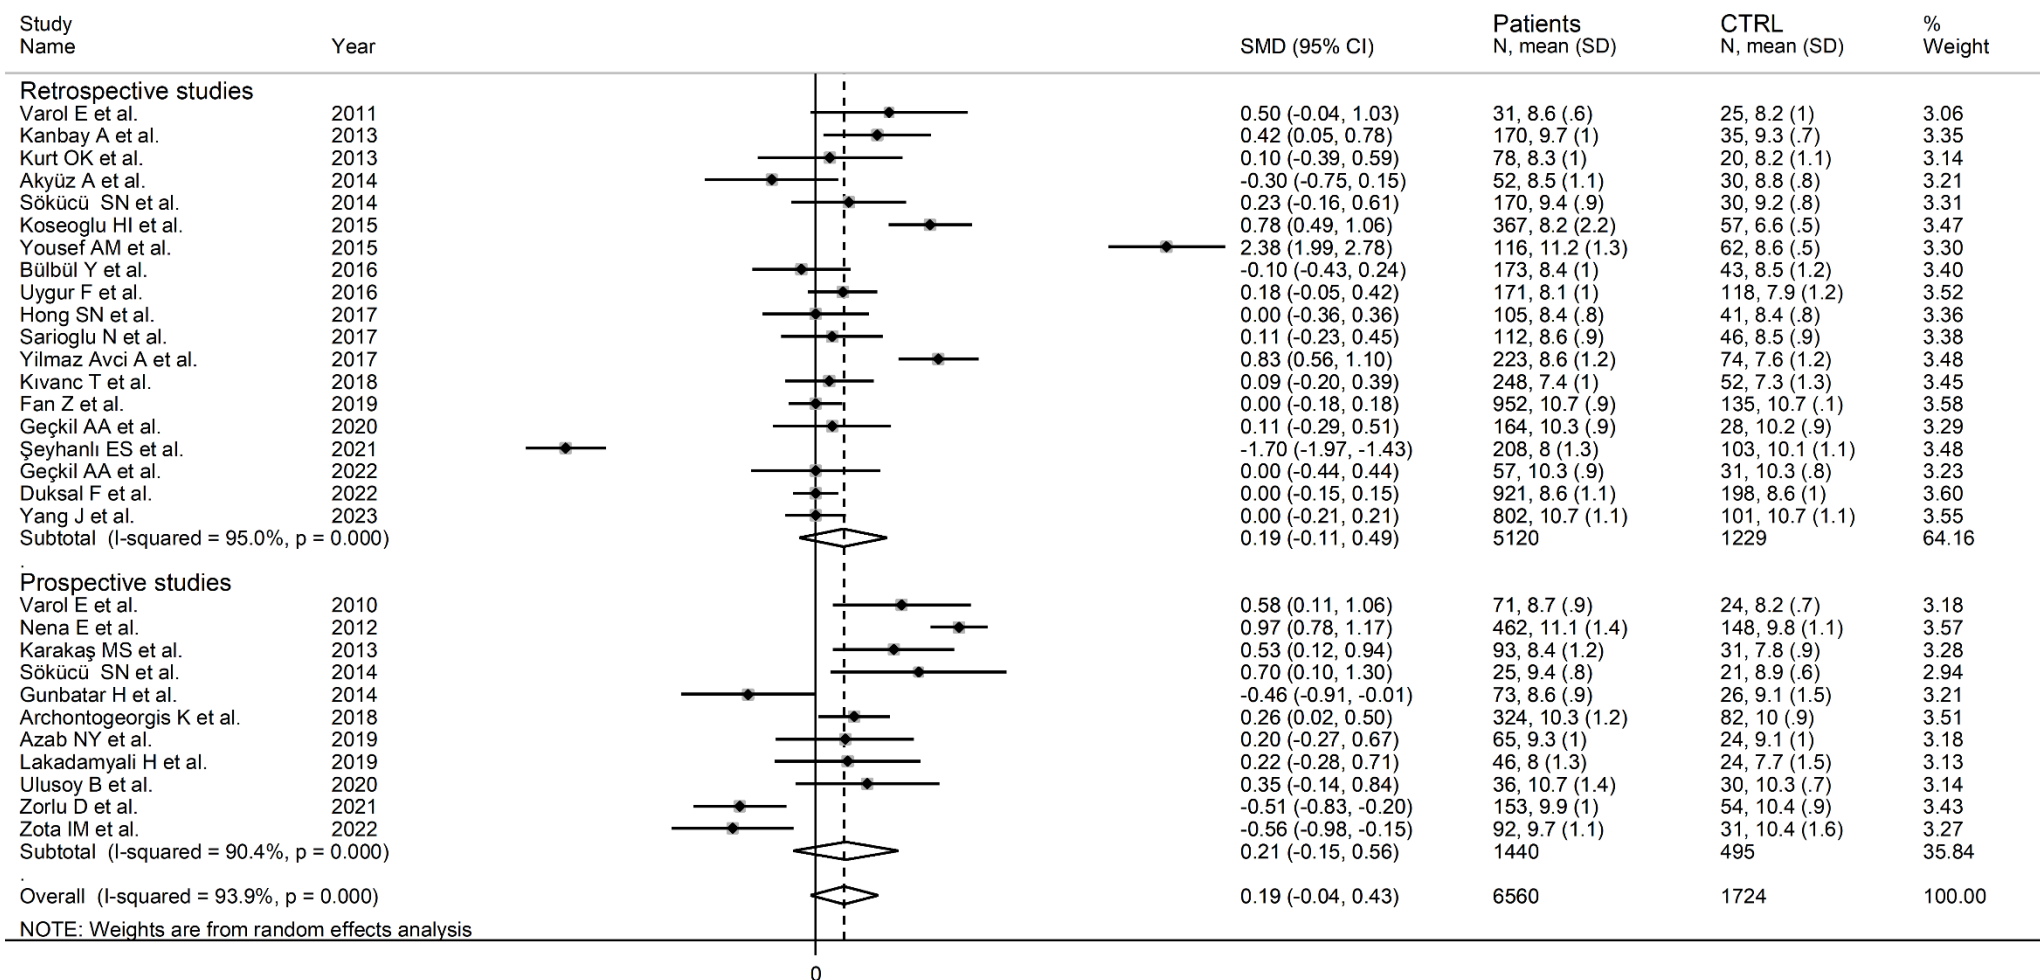

**Suppl. Figure S8.** Forest plot of studies examining MPV values of OSAS patients and controls according to study design.

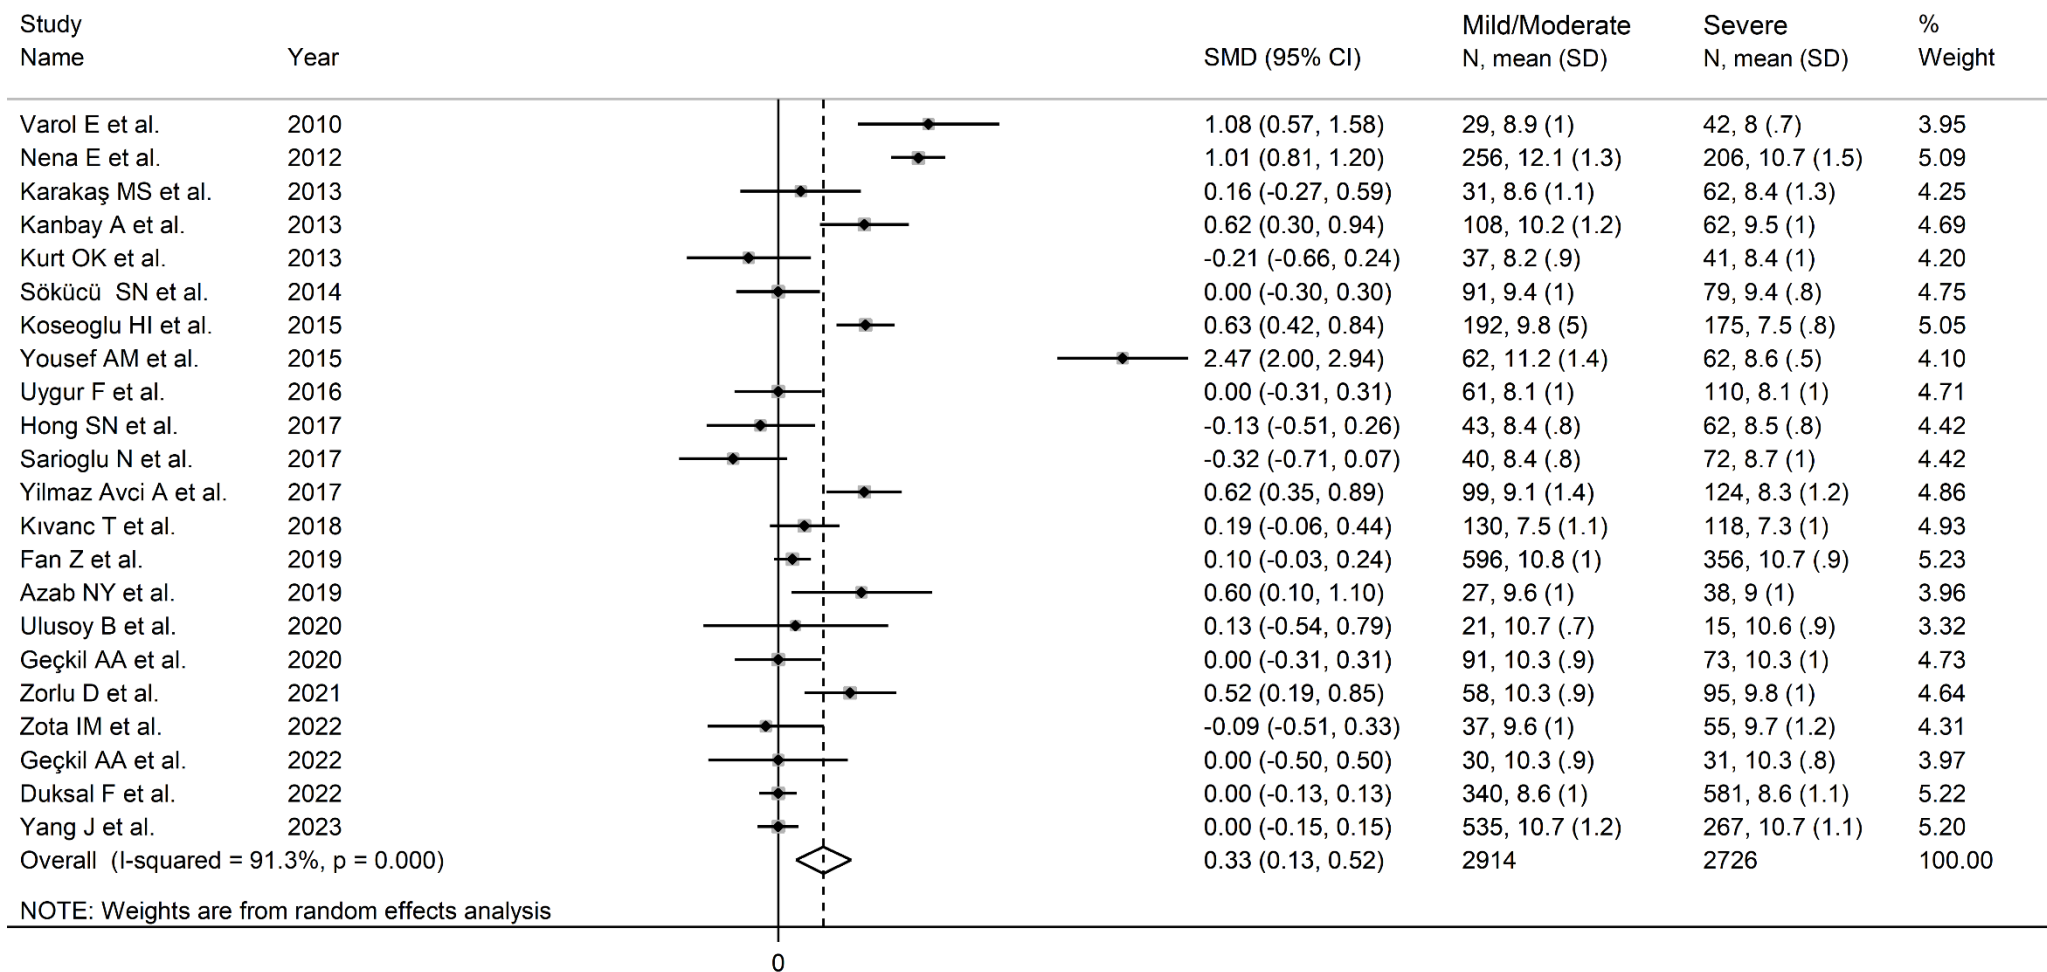

**Suppl. Figure S9.** Forest plot of studies examining MPV values of mild/moderate vs. severe OSAS patients.

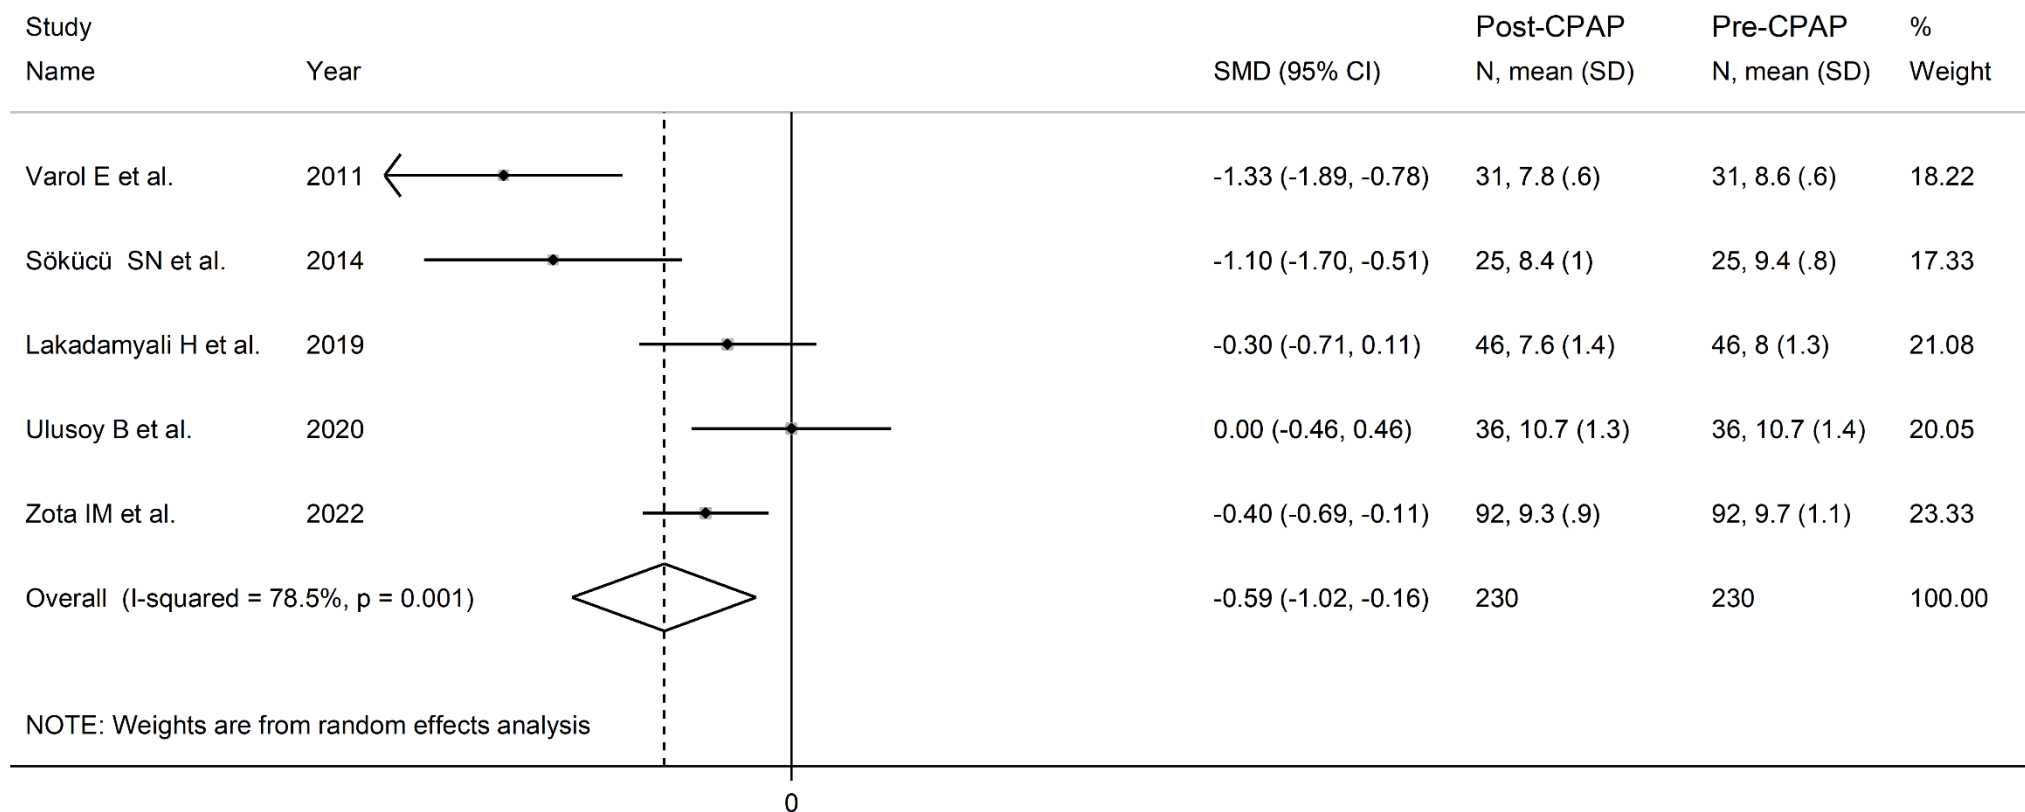

**Suppl. Figure S10.** Forest plot of studies examining MPV values of pre- and post-CPAP treatment patients.

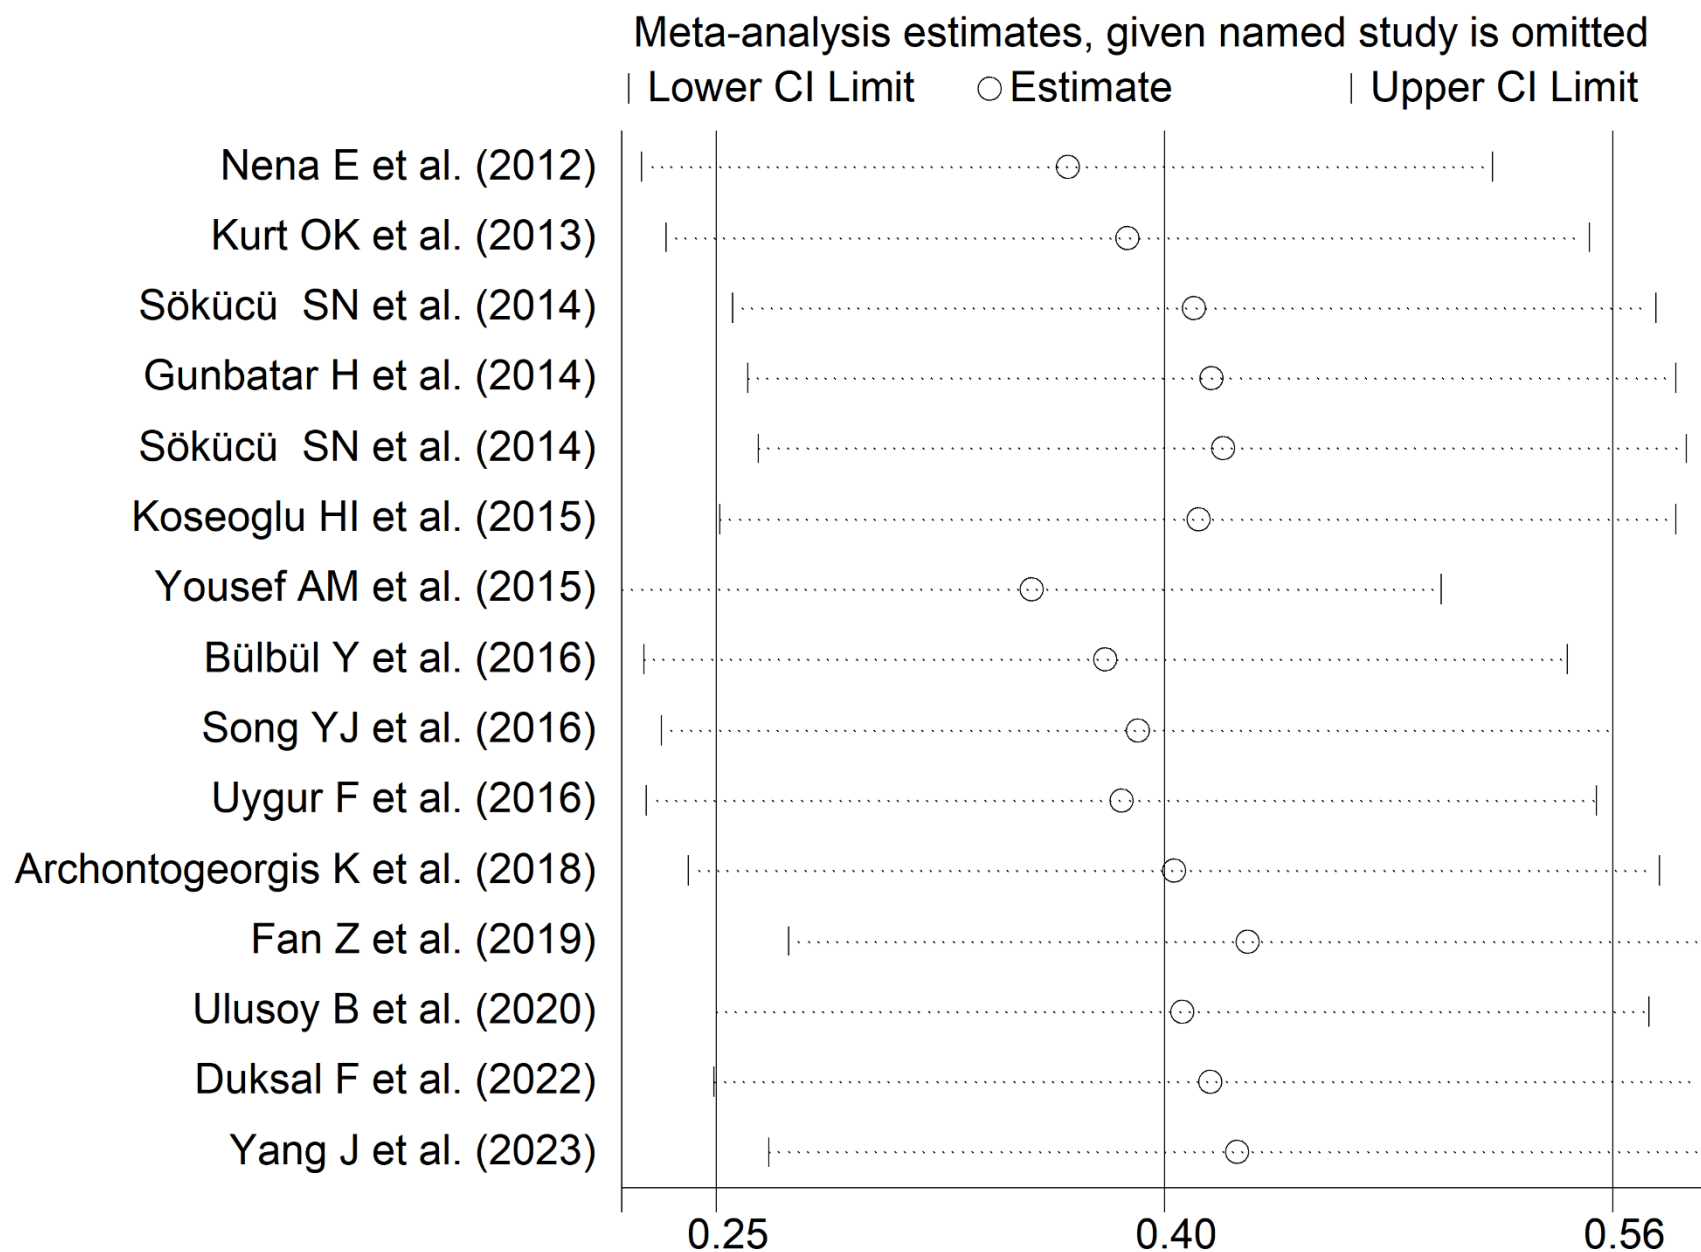

**Suppl. Figure S11.** Sensitivity analysis of the association between PDW values and OSAS. For each study, the displayed effect size (hollow circles) corresponds to an overall effect size computed from a meta-analysis excluding that study.

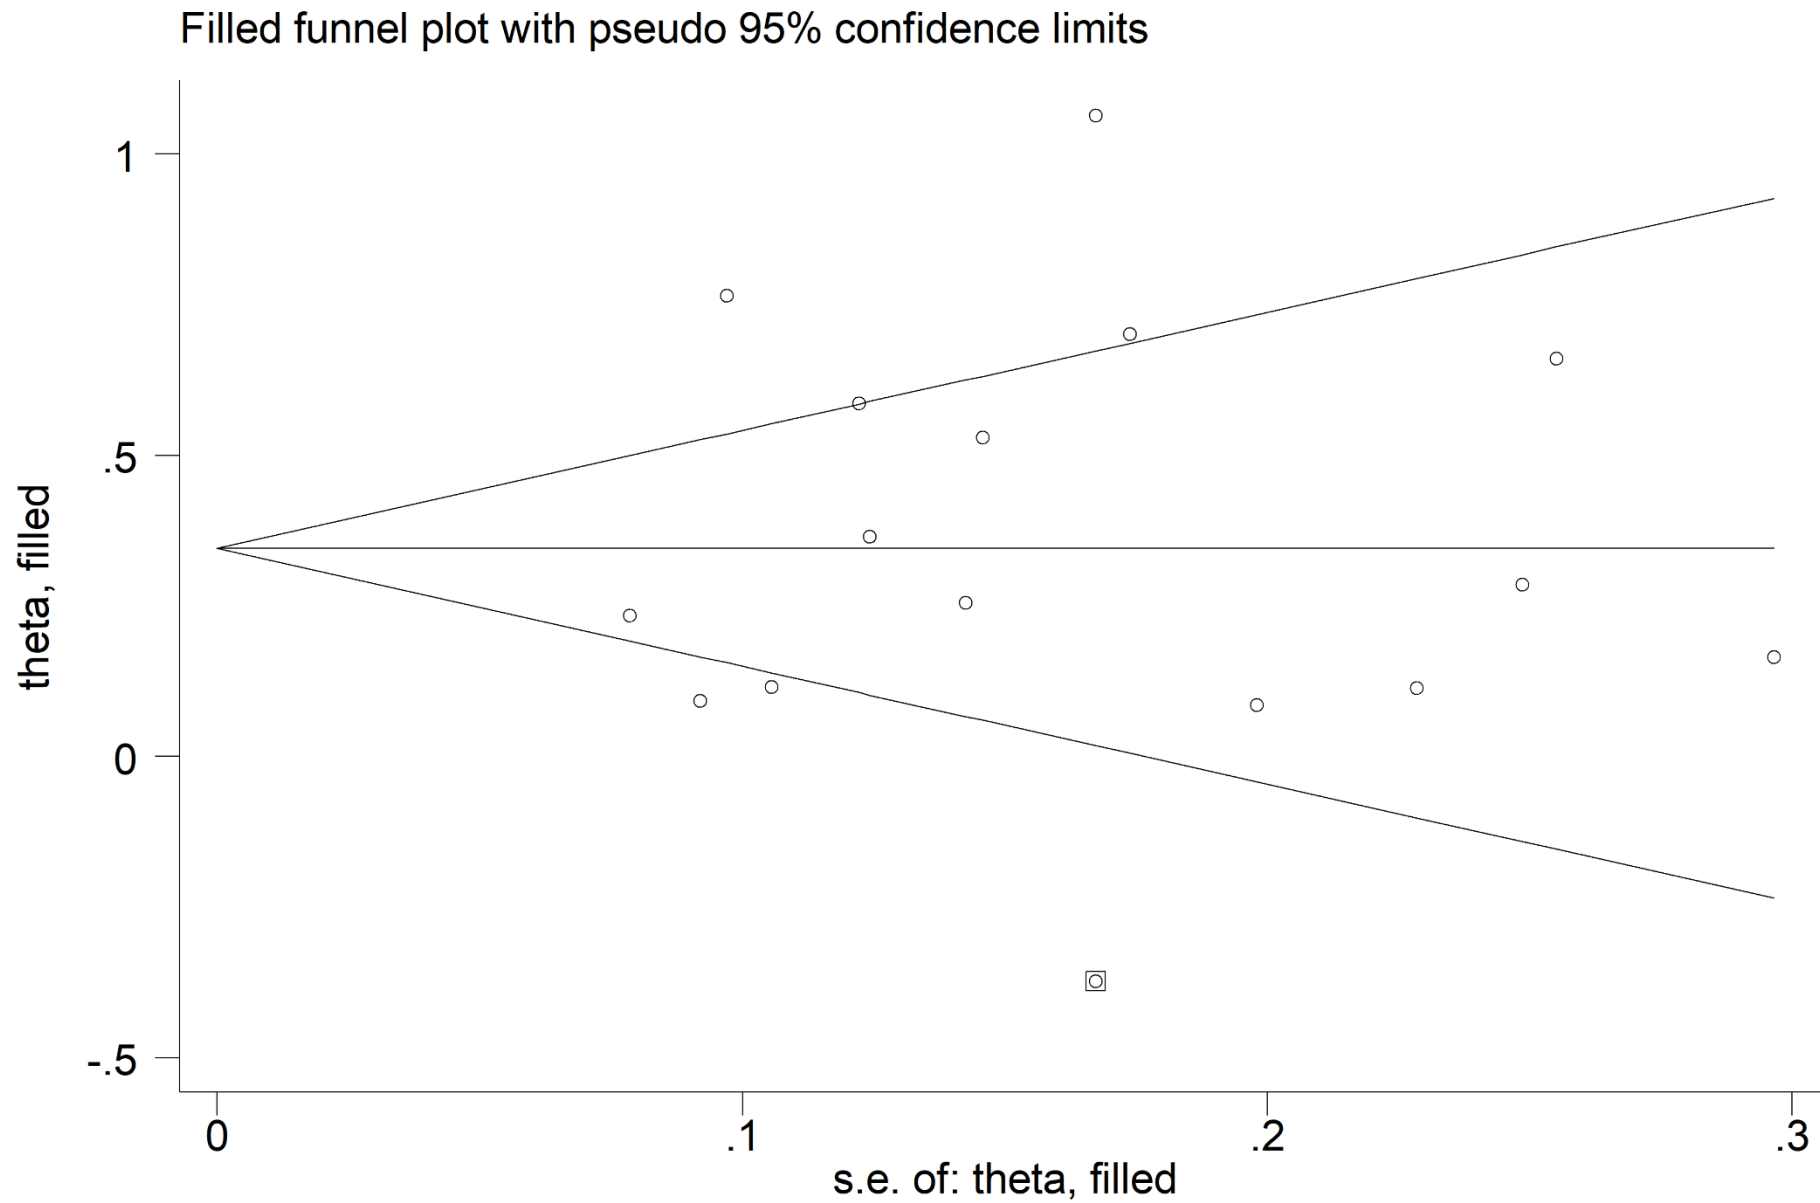

**Suppl. Figure S12.** Funnel plot of studies investigating association between PDW values and OSAS after trimming and filling. Dummy studies and genuine studies are represented by enclosed circles and free circles, respectively.

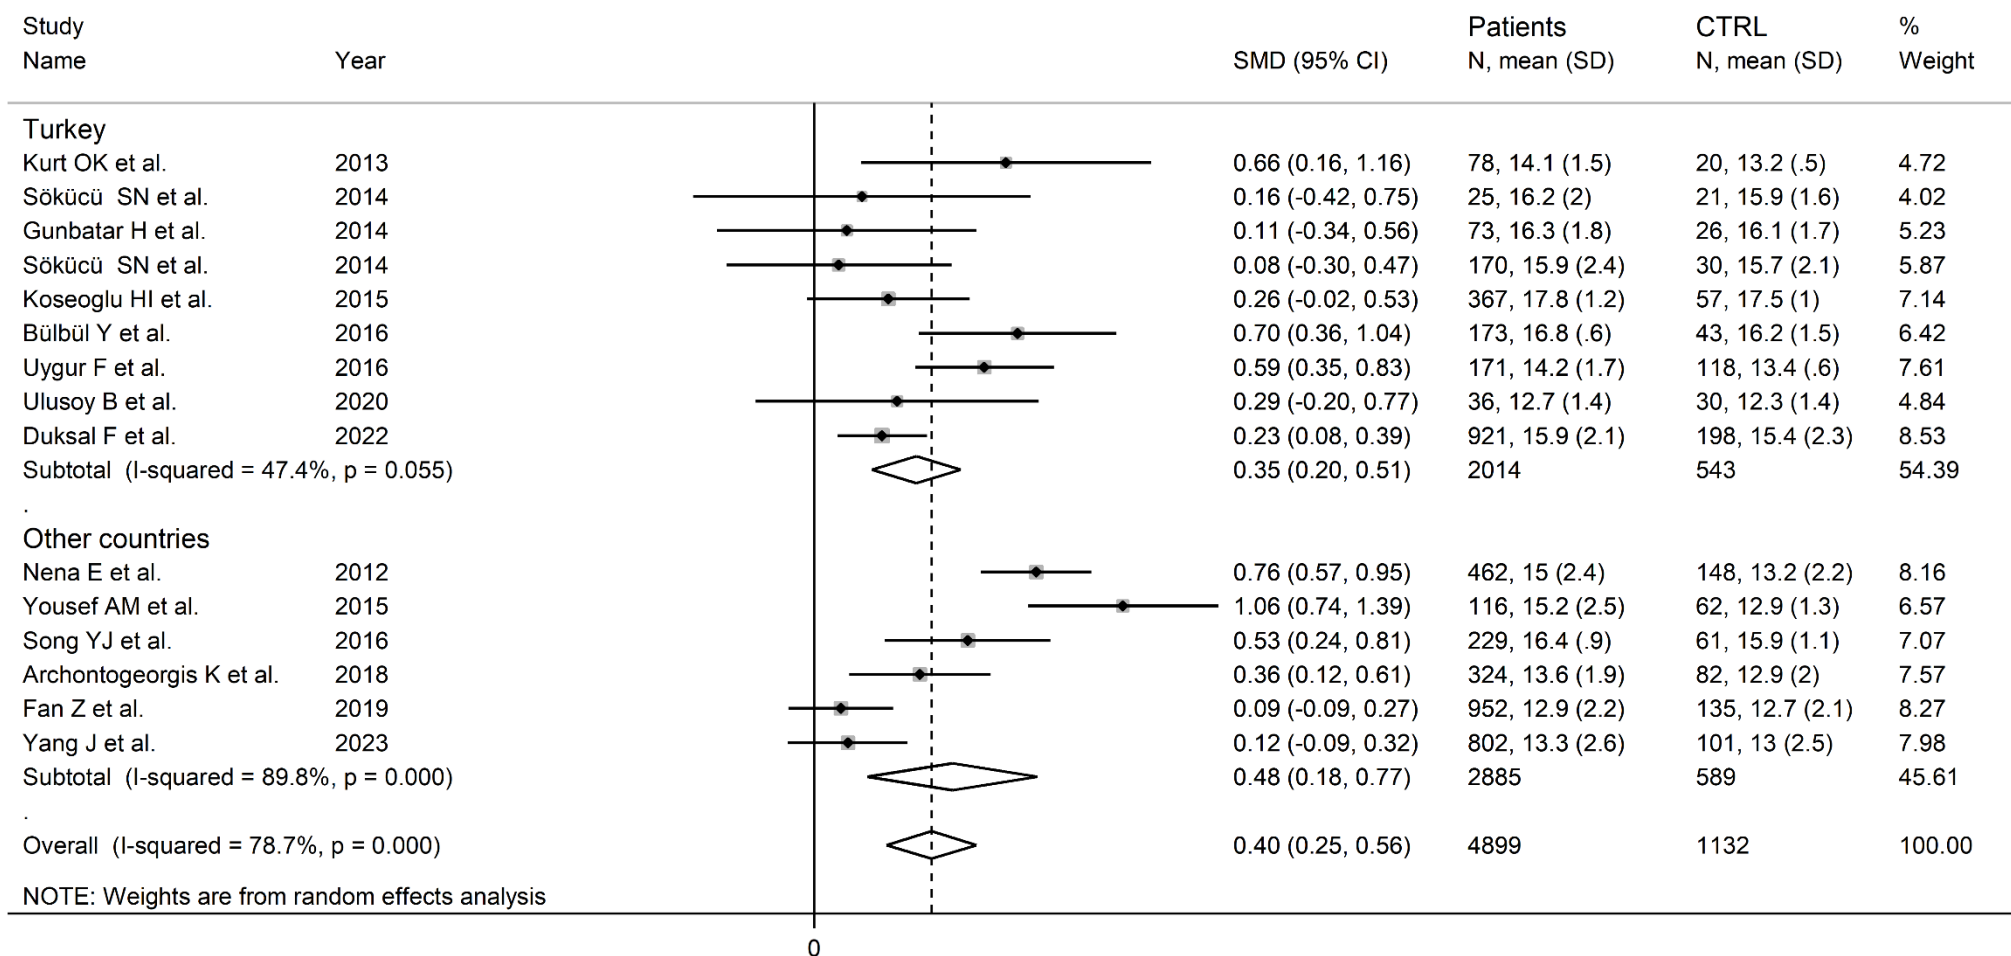

**Suppl. Figure S13.** Forest plot of studies examining PDW values of OSAS patients and controls according to country.

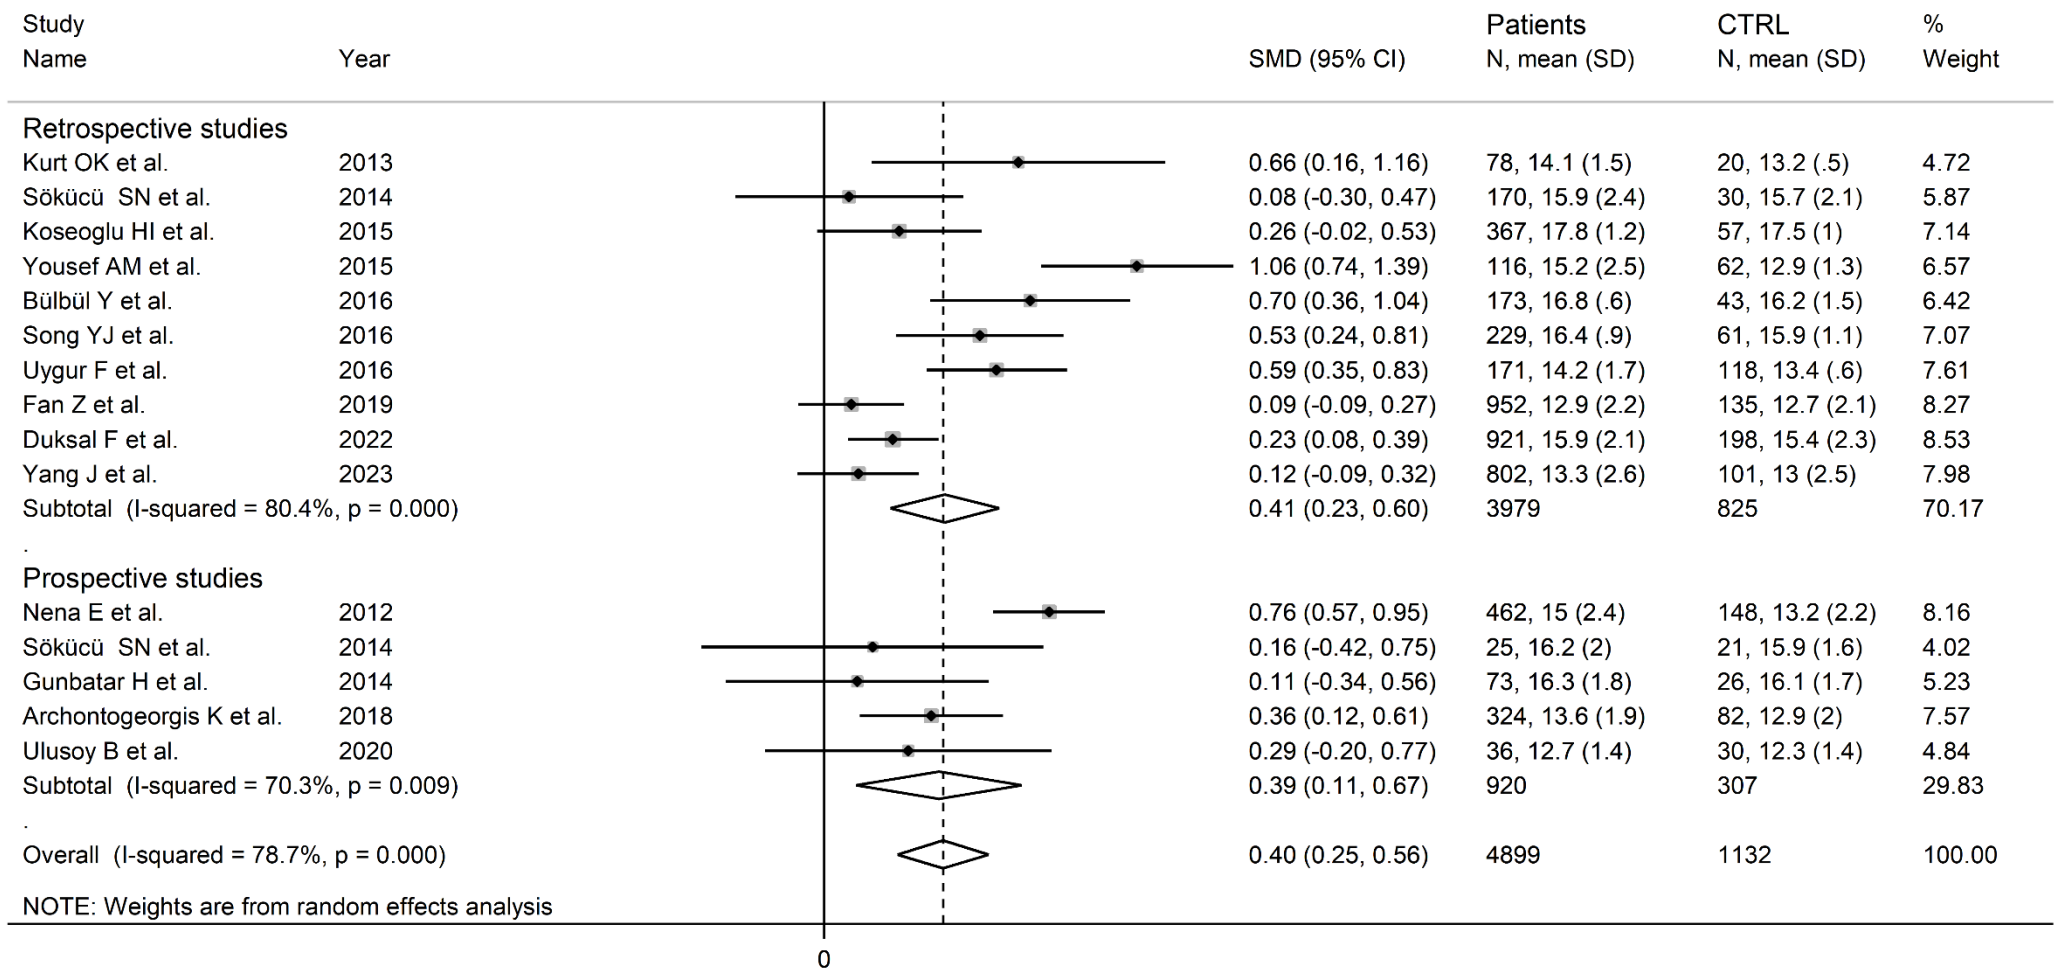

**Suppl. Figure S14.** Forest plot of studies examining PDW values of OSAS patients and controls according to study design.



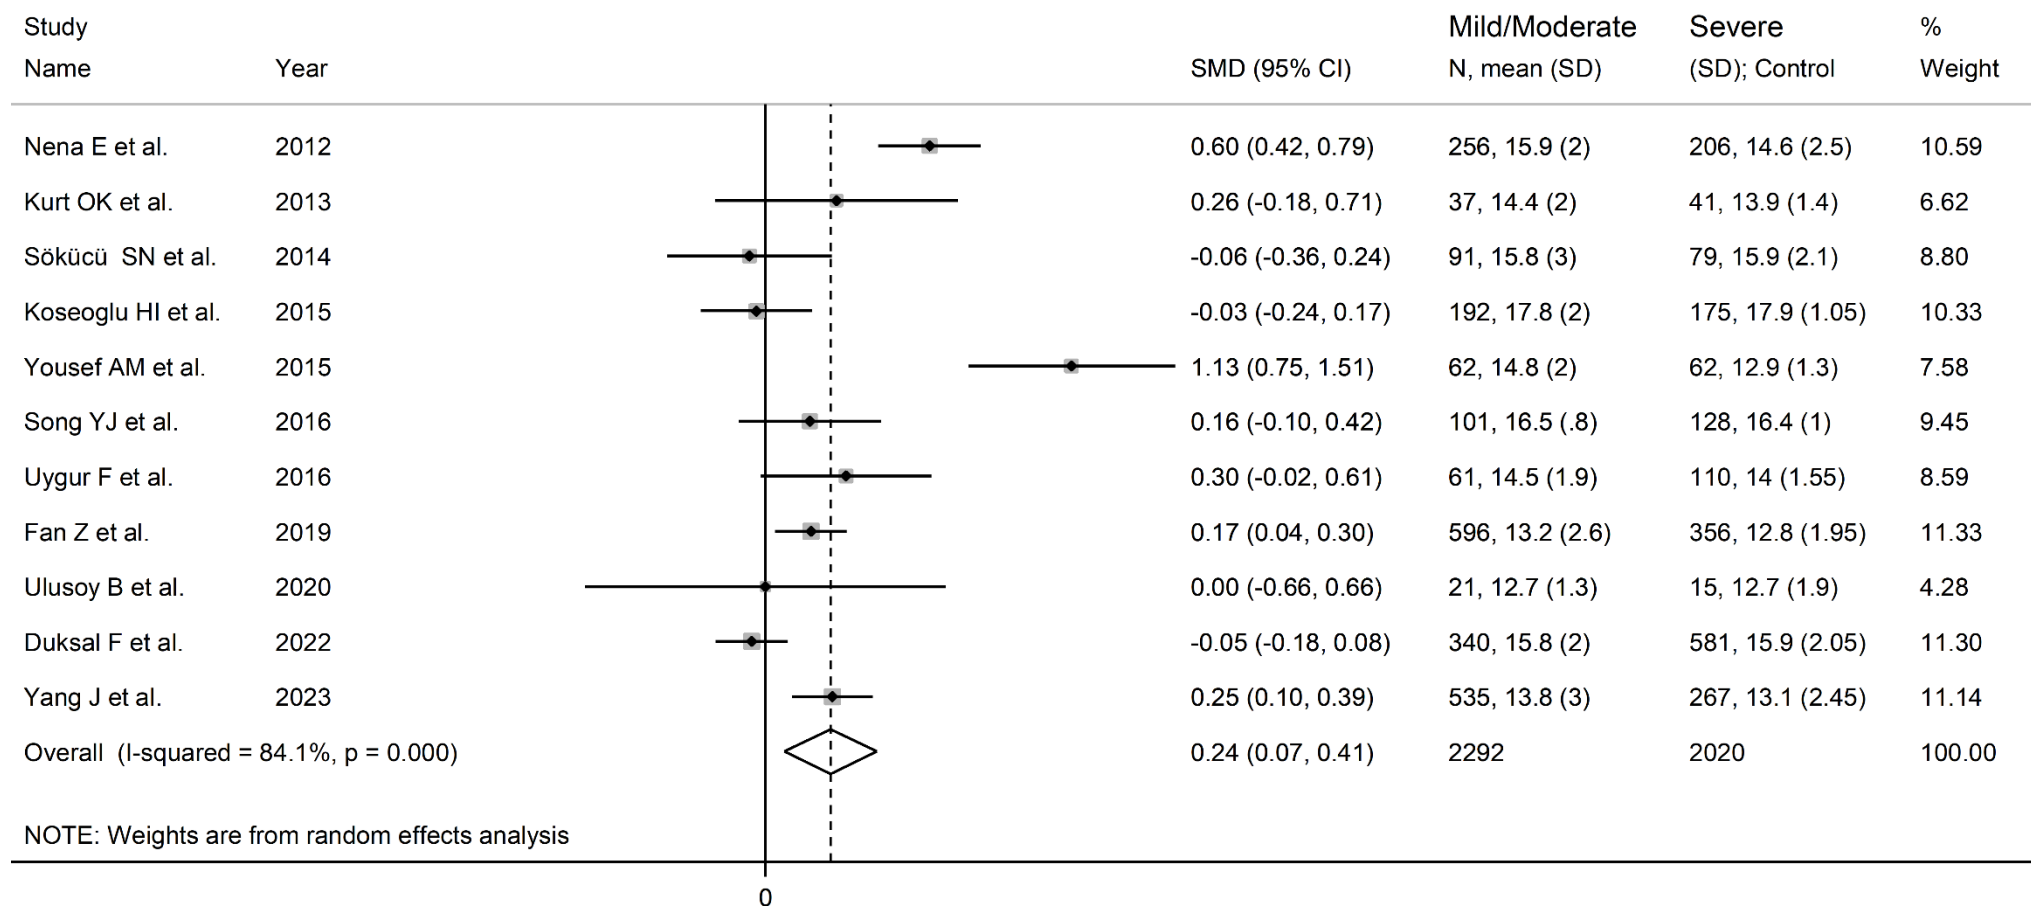

**Suppl. Figure S15.** Forest plot of studies examining PDW values of mild/moderate vs. severe OSAS patients.

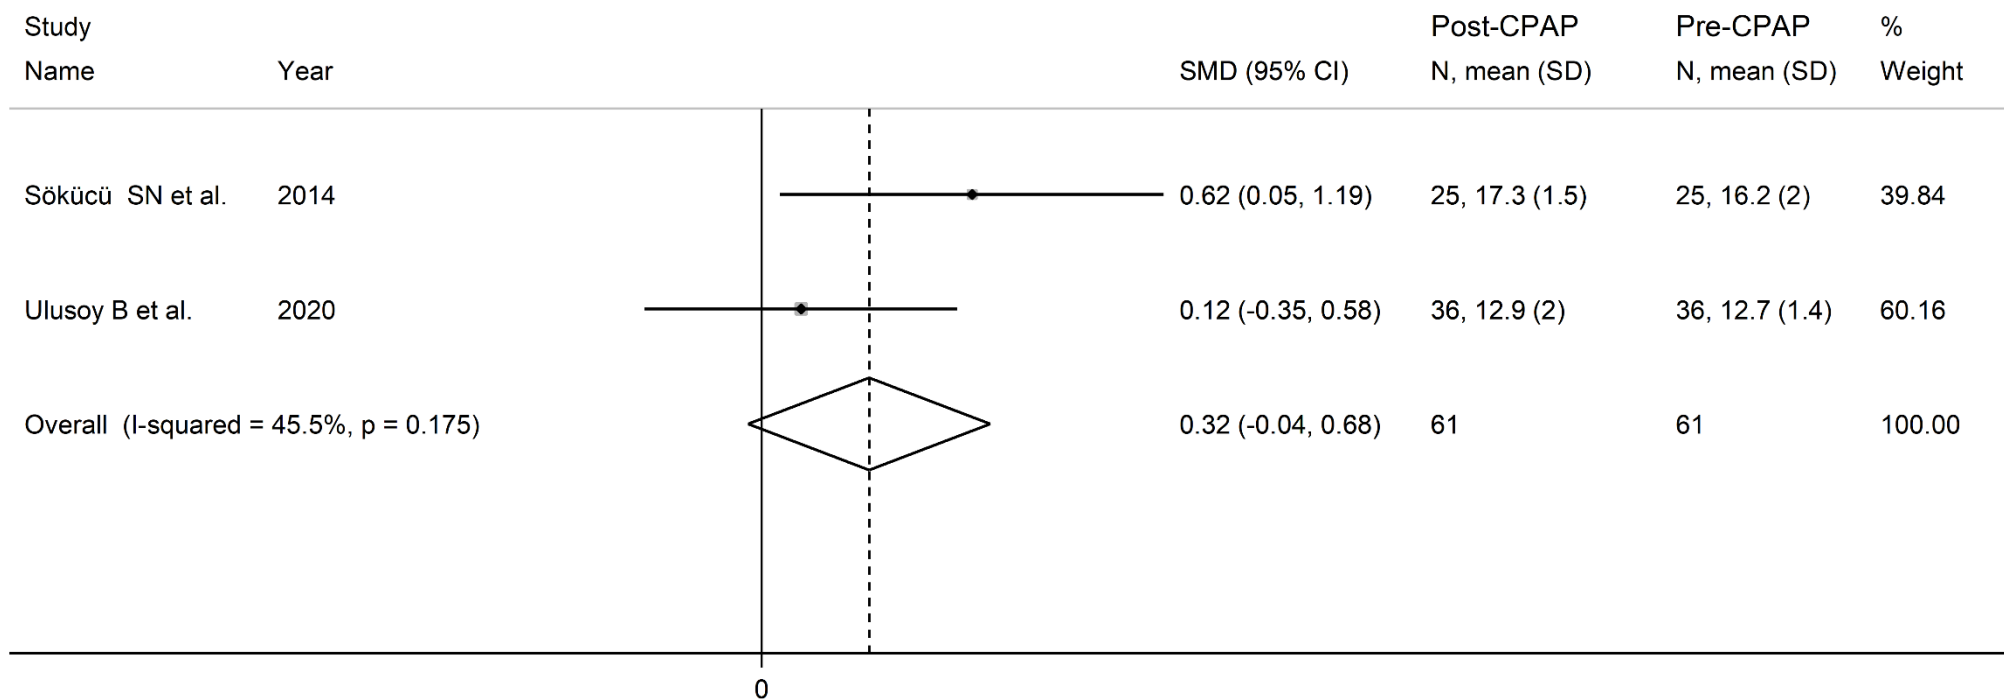

**Suppl. Figure S16.** Forest plot of studies examining PDW values of patients pre- and post-treatment with CPAP.
